# Supplementary material for: Isolation of Multidrug-Resistant Escherichia coli O157 from Goats in the Somali Region of Ethiopia: A Cross-Sectional, Abattoir-Based Study
Source: PubMed Central journal article supplement (PMC4641637; doi:10.1371/journal.pone.0142905), 2015-11-11
Supplement: pone.0142905.s001.pdf [file pone.0142905.s001.pdf]

# Administrative Regions of Ethiopia

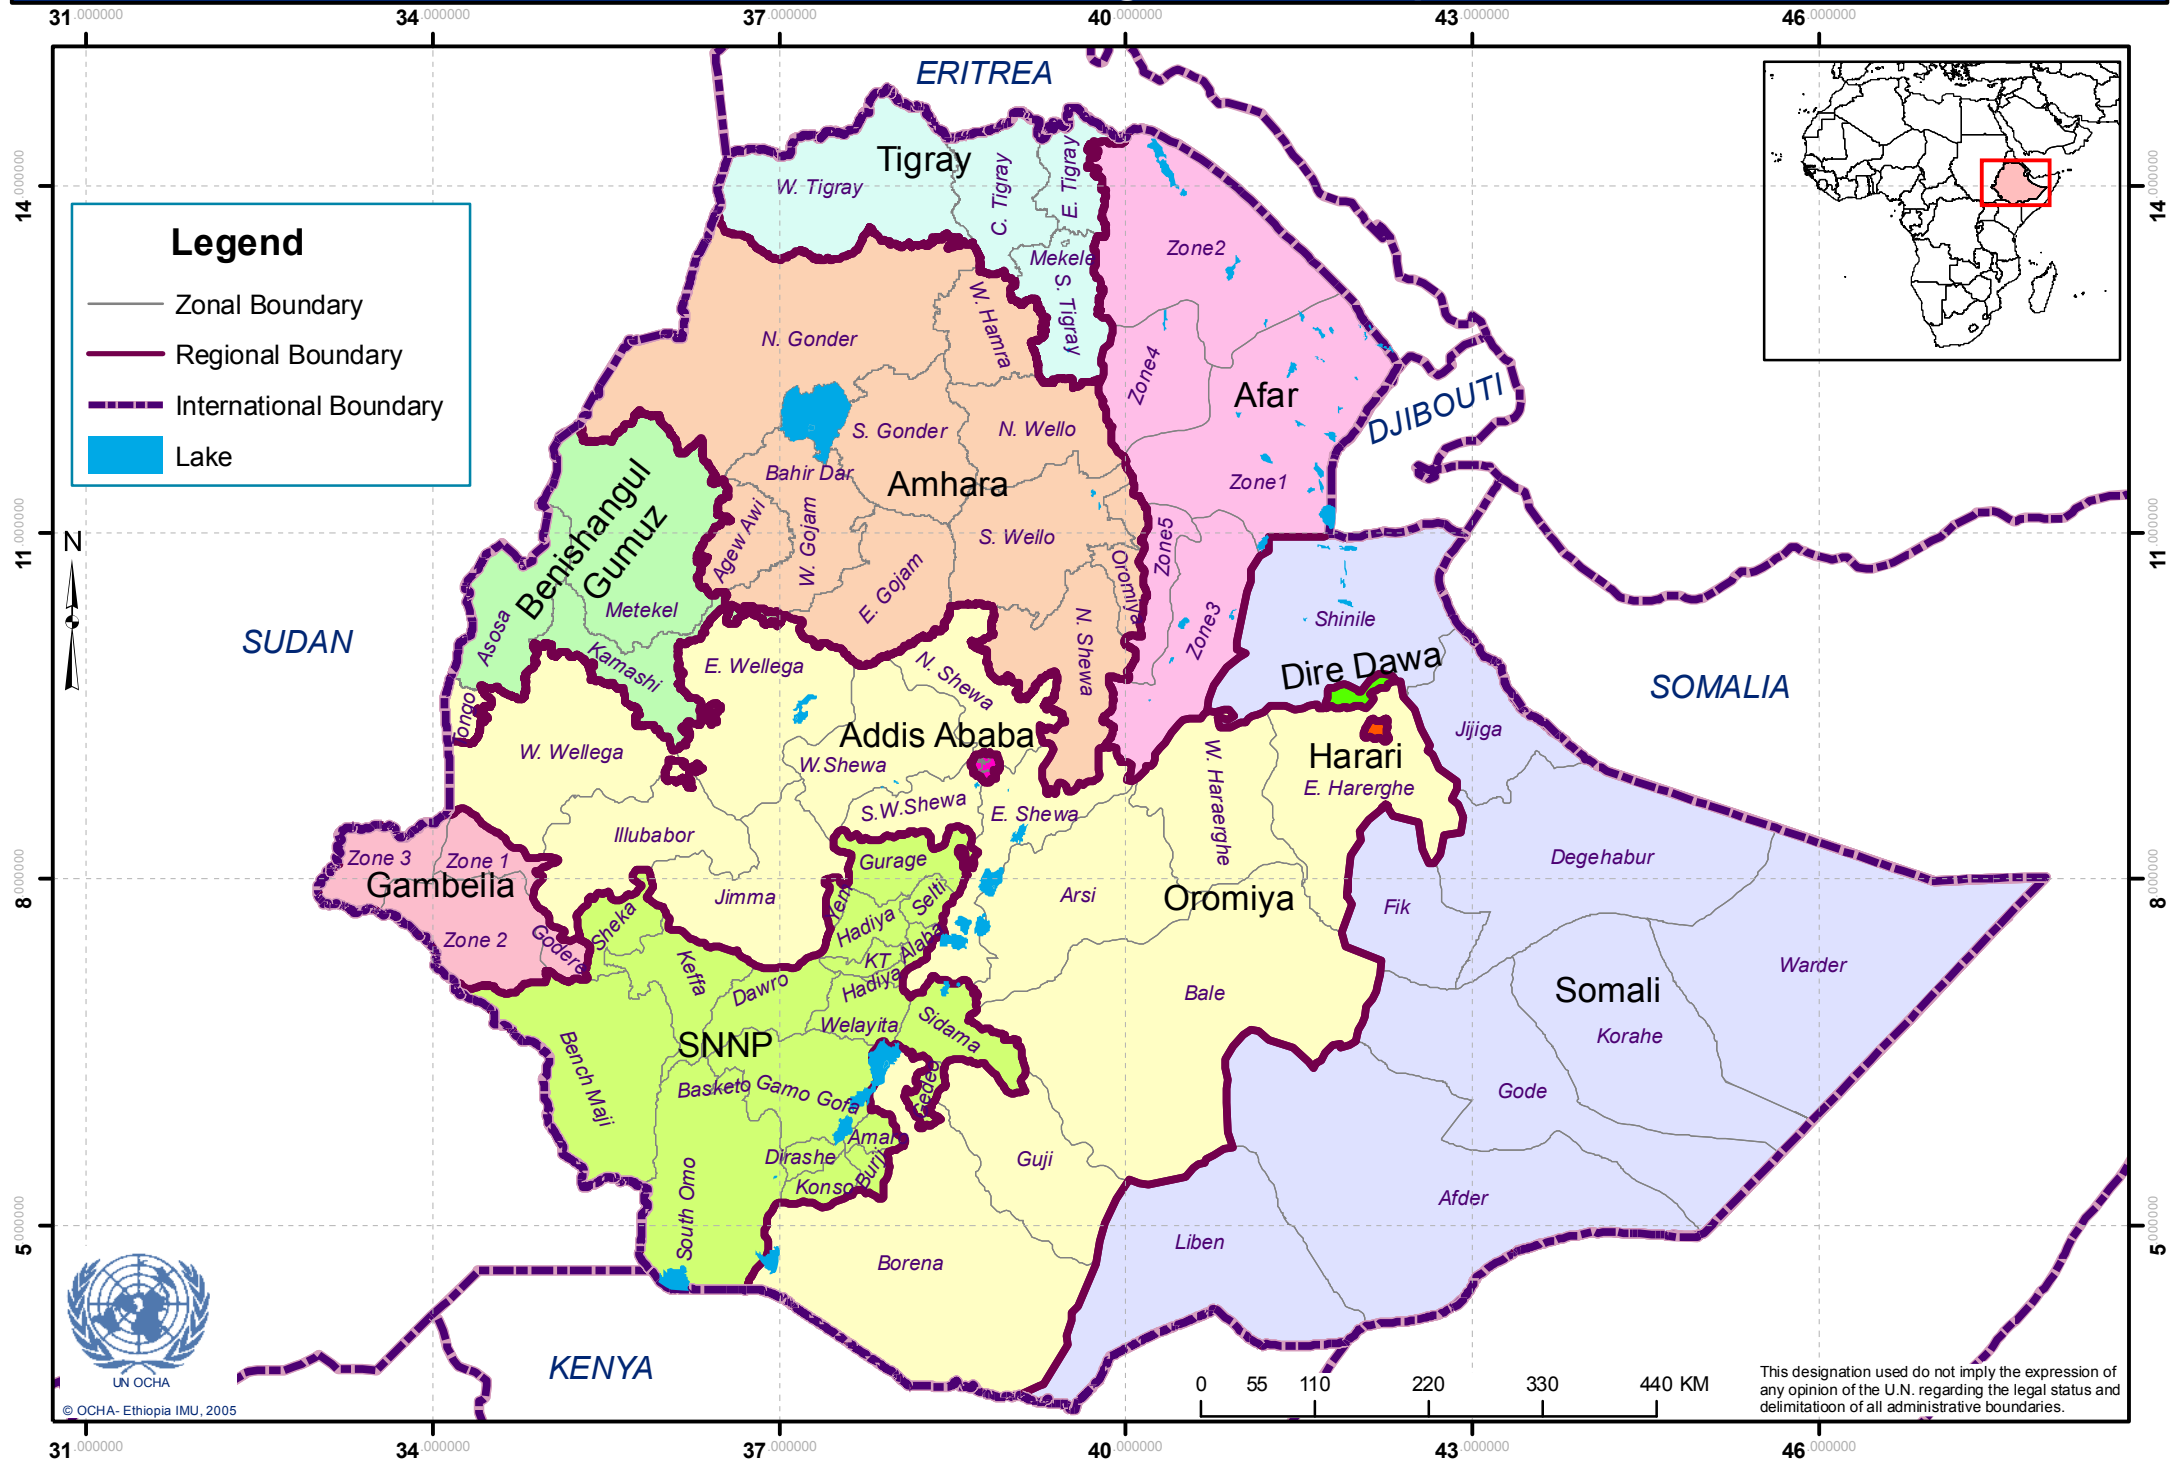

This designation used do not imply the expression of any opinion of the U.N. regarding the legal status and delimitation of all administrative boundaries.
